# Supplementary material for: Genome-Wide Detection and Analysis of Multifunctional Genes
Source: PLOS journal article supplement (doi:10.1371/journal.pcbi.1004467), 2015-10-05

with disease

$$p = 0.009$$

multifunc

other

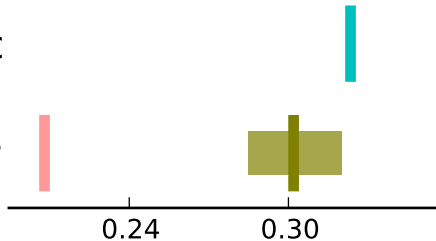

with two diseases

$$p < 0.001$$

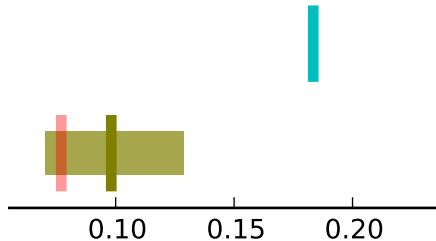

Supplement: S6 (10.1371/journal.pcbi.1004467.s006) [file journal.pcbi.1004467.s006]
